# Supplementary material for: Multilevel regression modeling for aneuploidy classification and physical separation of maternal cell contamination facilitates the QF-PCR based analysis of common fetal aneuploidies
Source: PubMed Central journal article supplement (PMC6701765; doi:10.1371/journal.pone.0221227), 2019-08-20
Supplement: pone.0221227.s005.pdf [file pone.0221227.s005.pdf]

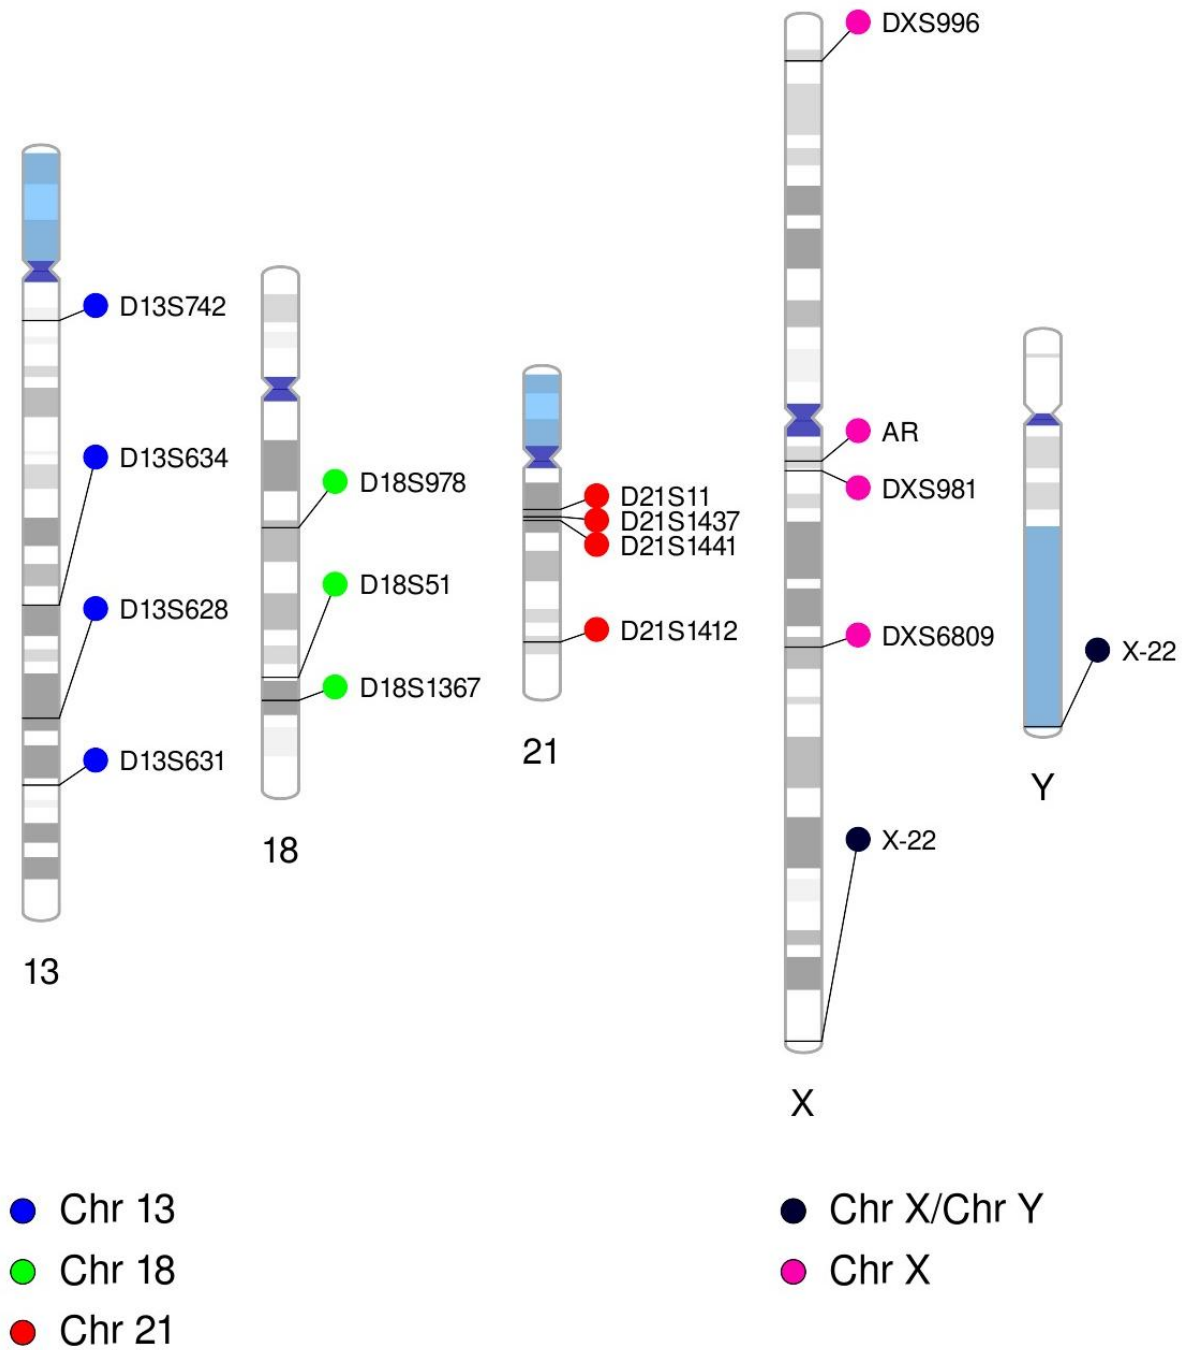

**S1 Fig.** Chromosomal locations of the QF-PCR markers used as a back-up of the main QF-PCR reaction. Markers are colored by the chromosome/chromosomes they are designed to target.
