# Supplementary material for: Multilevel regression modeling for aneuploidy classification and physical separation of maternal cell contamination facilitates the QF-PCR based analysis of common fetal aneuploidies
Source: PubMed Central journal article supplement (PMC6701765; doi:10.1371/journal.pone.0221227), 2019-08-20
Supplement: pone.0221227.s006.pdf [file pone.0221227.s006.pdf]

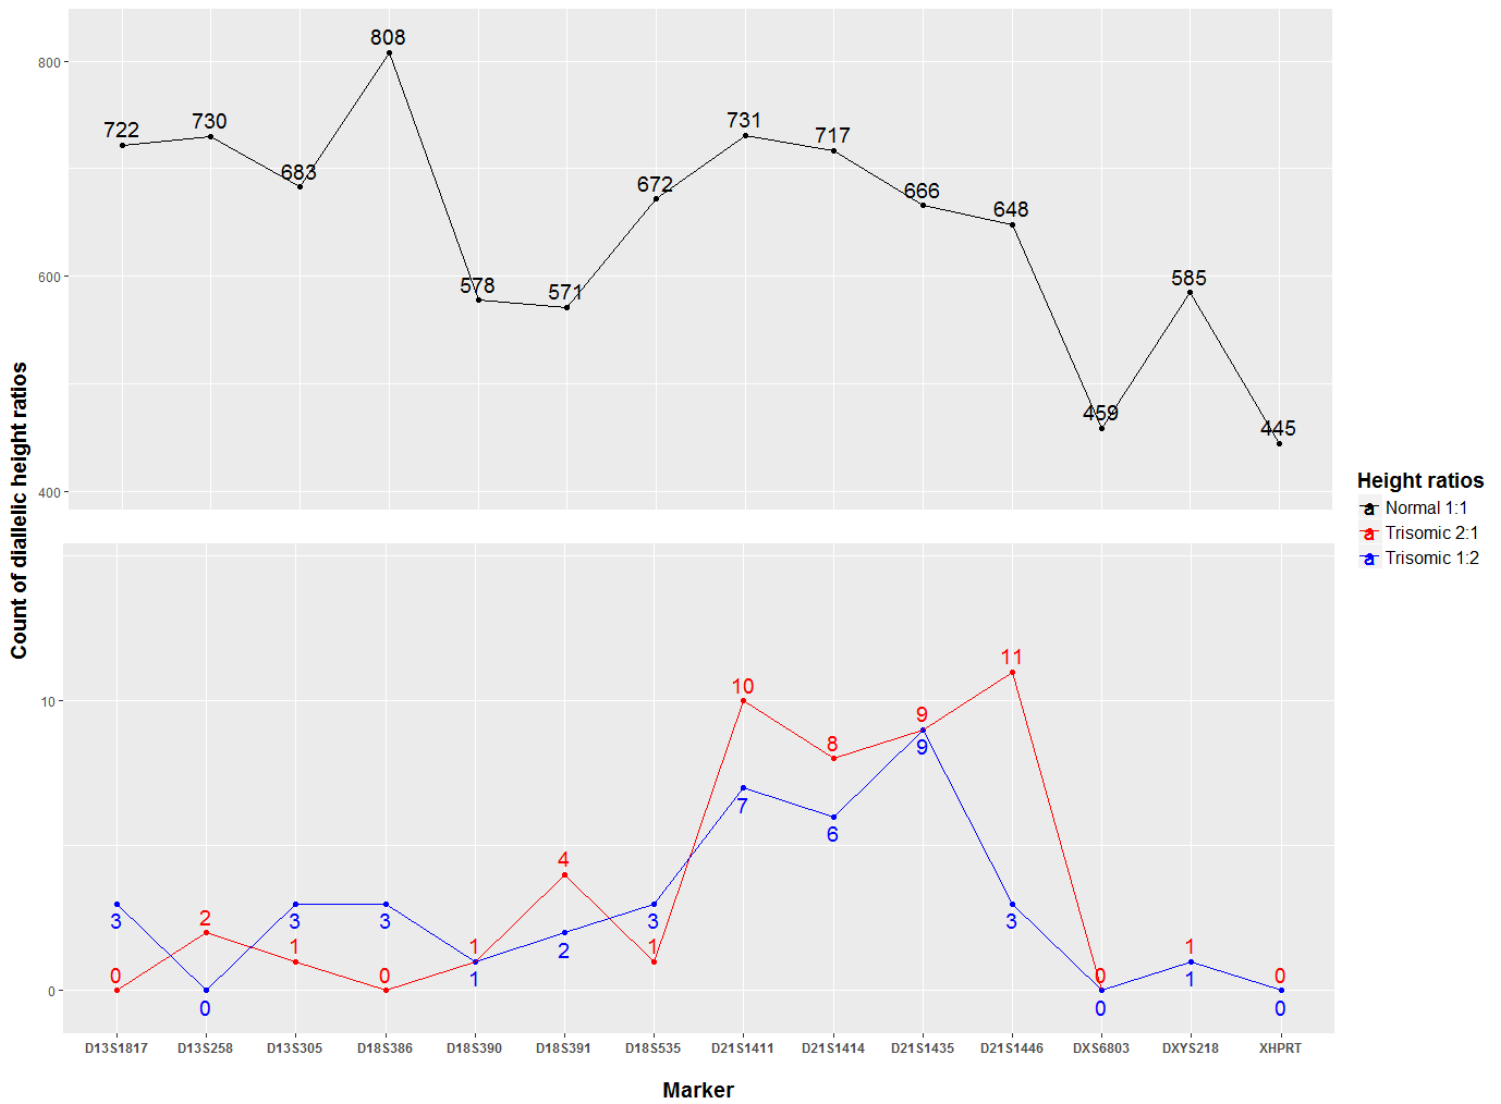

**S2 Fig.** Graphical presentation of the number of the height ratios used in multilevel regression analysis, given by marker. For each marker the number of Normal 1:1 (black color), Trisomic 2:1 (red color) and Trisomic 1:2 (blue color) height ratios is presented.
