# Supplementary material for: Multilevel regression modeling for aneuploidy classification and physical separation of maternal cell contamination facilitates the QF-PCR based analysis of common fetal aneuploidies
Source: PubMed Central journal article supplement (PMC6701765; doi:10.1371/journal.pone.0221227), 2019-08-20
Supplement: pone.0221227.s007.pdf [file pone.0221227.s007.pdf]

**A)**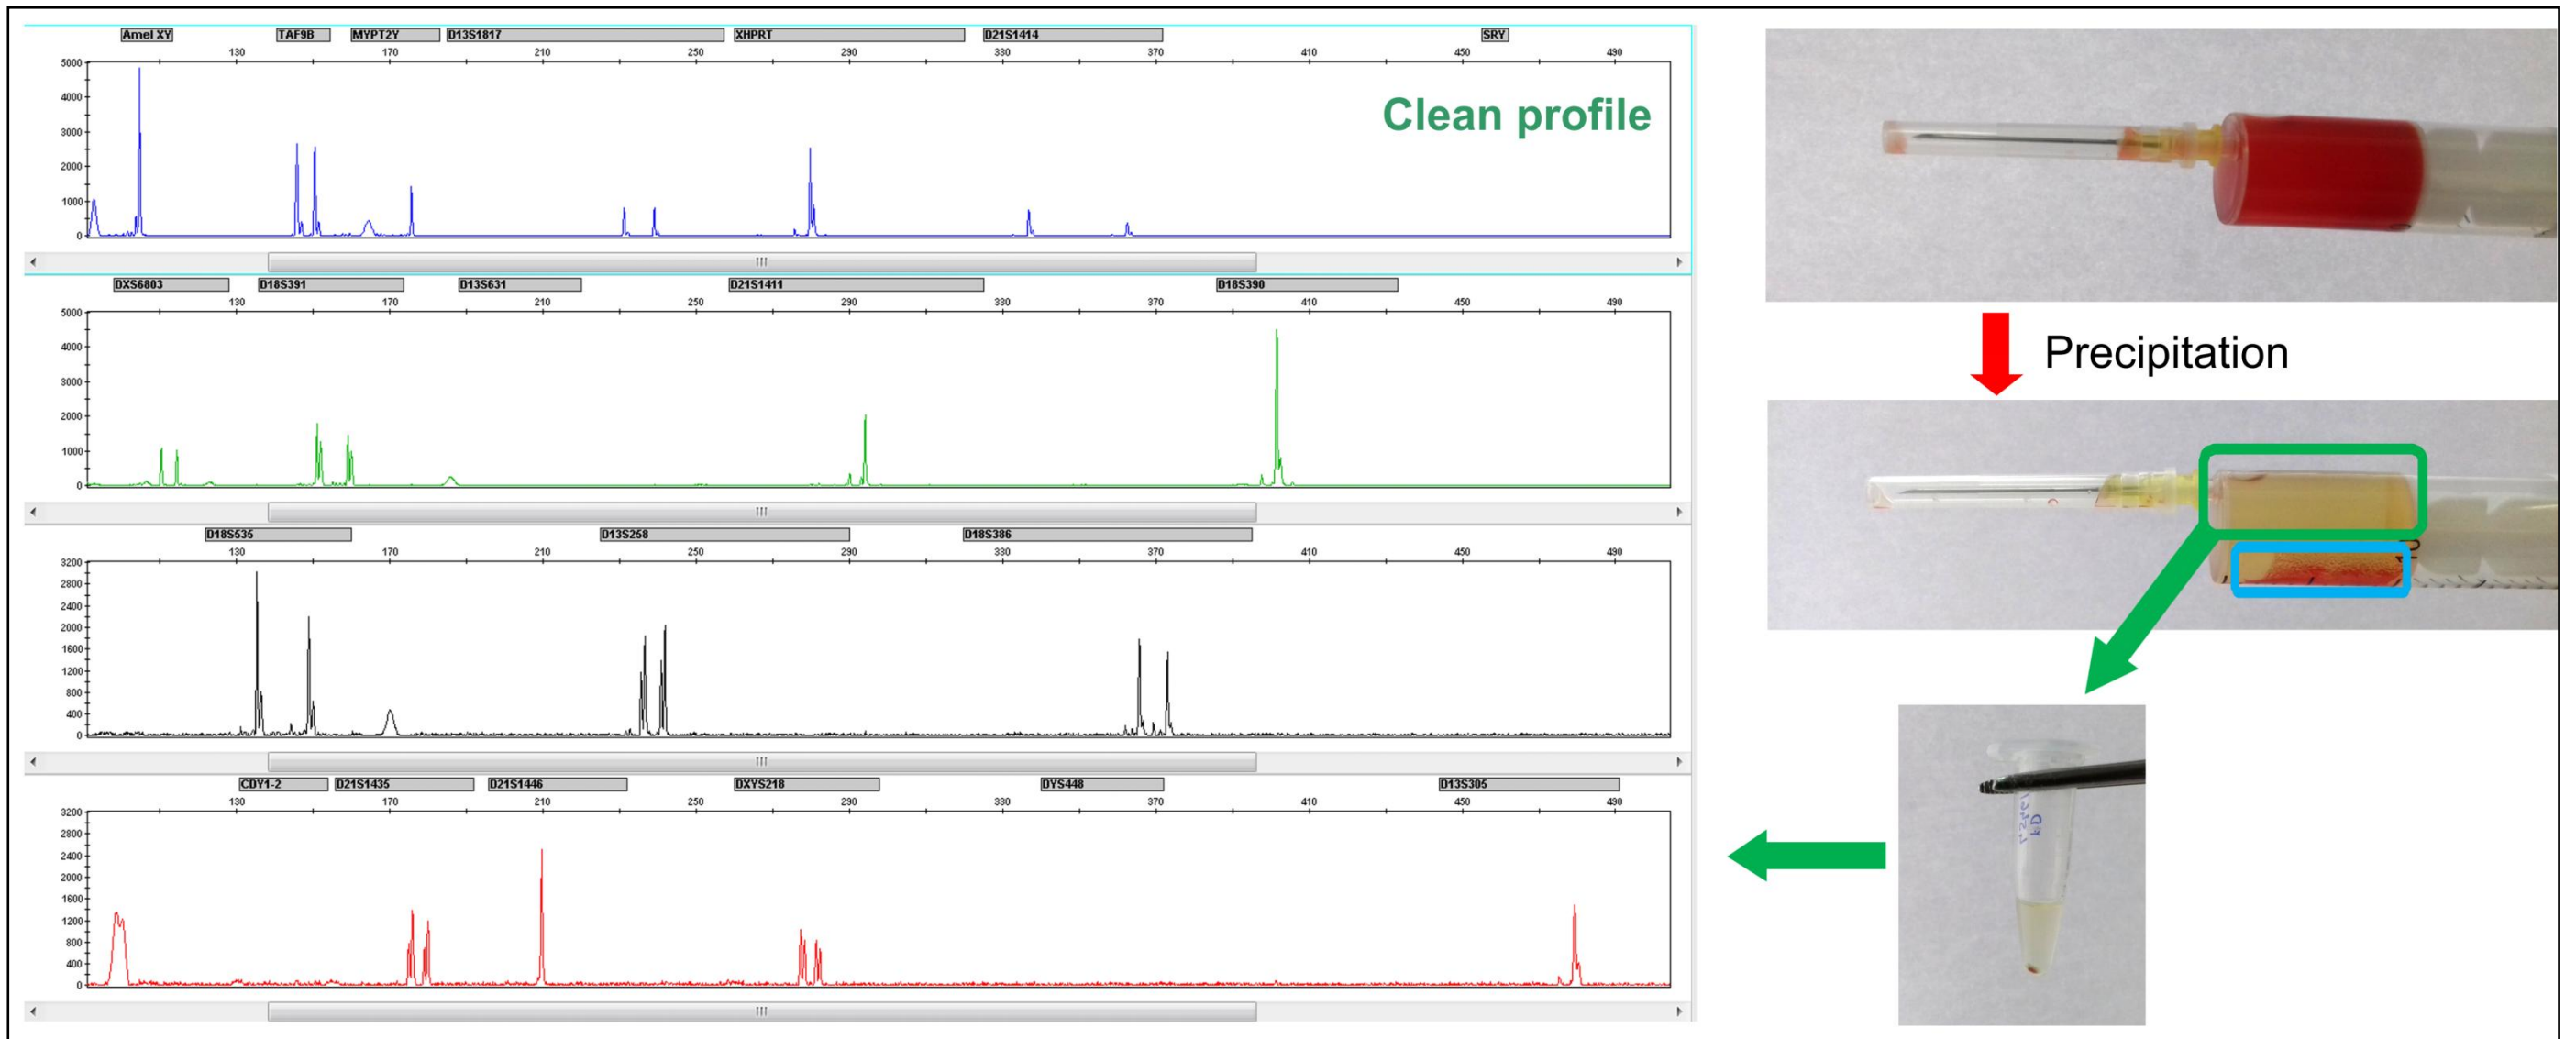**B)**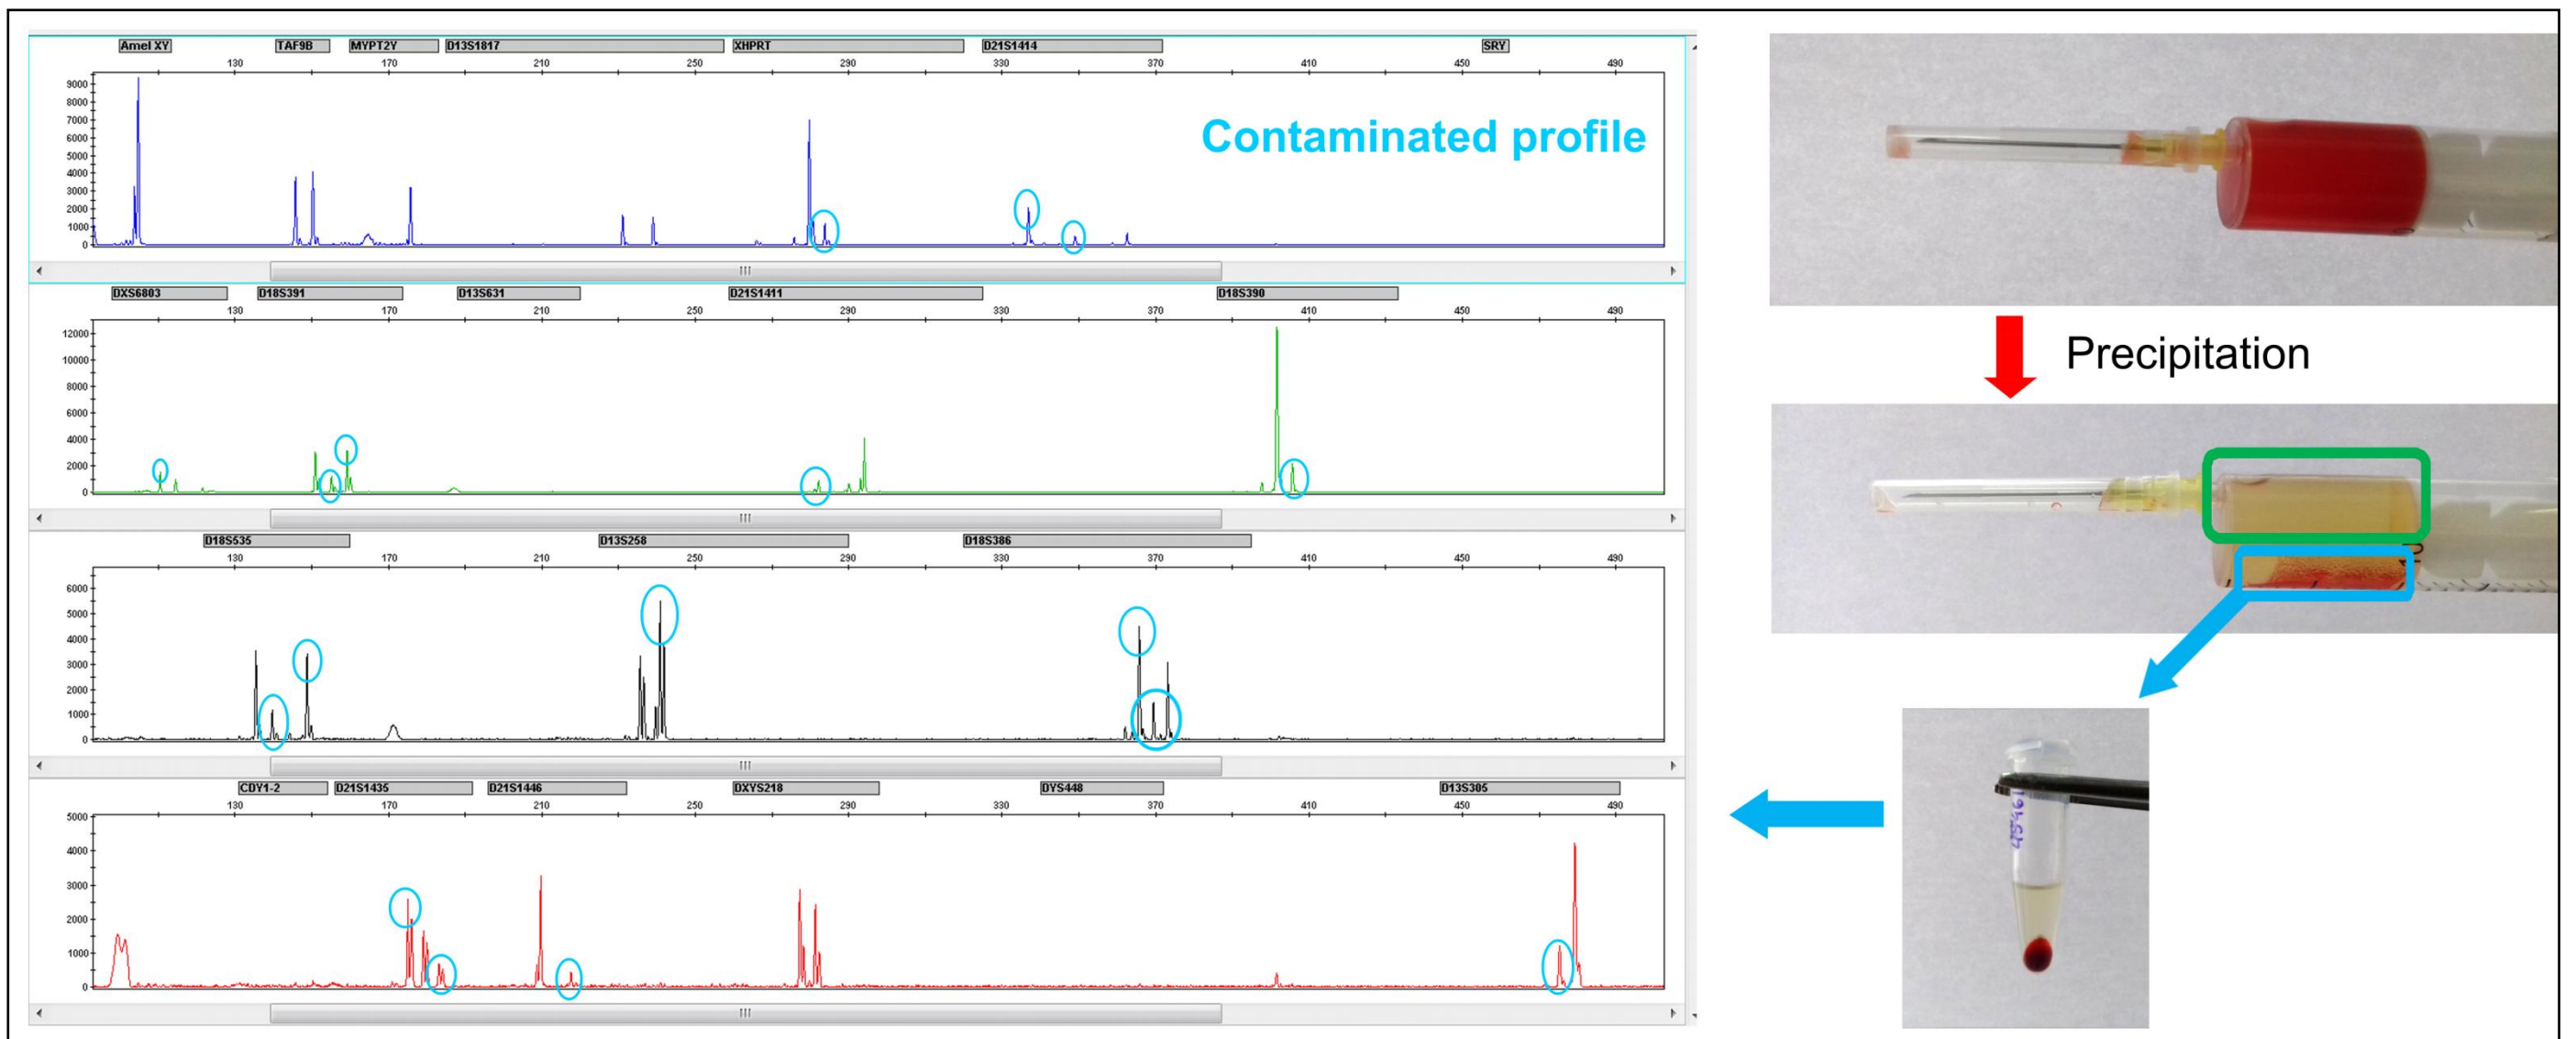

**S3 Fig. Illustration of the treatment of the contaminated amniotic fluids.** Contaminated amniotic fluid is precipitated for 6-12 hours and then **A)** Upper clear phase (green color) was collected resulting in amplification of a pure uncontaminated profile of the fetus and **B)** Afterwards, lower contaminated phase (blue color) was collected separately wherein the amplification showed maternal cell contamination. Blue circles show the contaminating alleles from the mother.
