# Supplementary material for: Multilevel regression modeling for aneuploidy classification and physical separation of maternal cell contamination facilitates the QF-PCR based analysis of common fetal aneuploidies
Source: PubMed Central journal article supplement (PMC6701765; doi:10.1371/journal.pone.0221227), 2019-08-20
Supplement: pone.0221227.s009.pdf [file pone.0221227.s009.pdf]

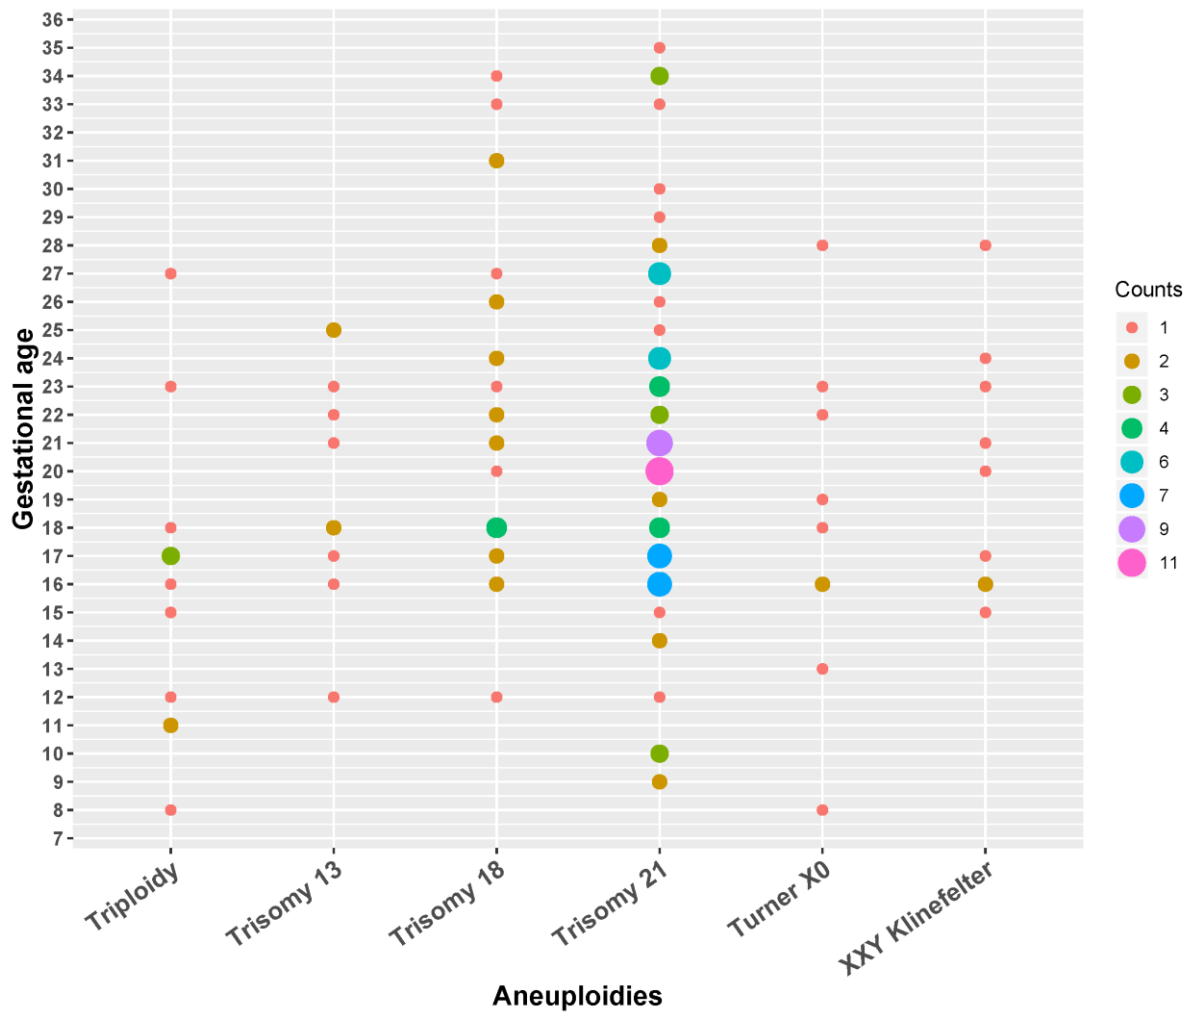

**S5 Fig. Detailed distribution of the counts of the maternal gestational age by different types of aneuploidies.** Size of the circles corresponds to the number of patients in the given gestational age group. In addition, they are colored differently for better visualization.
