# Supplementary material for: Multilevel regression modeling for aneuploidy classification and physical separation of maternal cell contamination facilitates the QF-PCR based analysis of common fetal aneuploidies
Source: PubMed Central journal article supplement (PMC6701765; doi:10.1371/journal.pone.0221227), 2019-08-20

**A)****Multiplex PCR**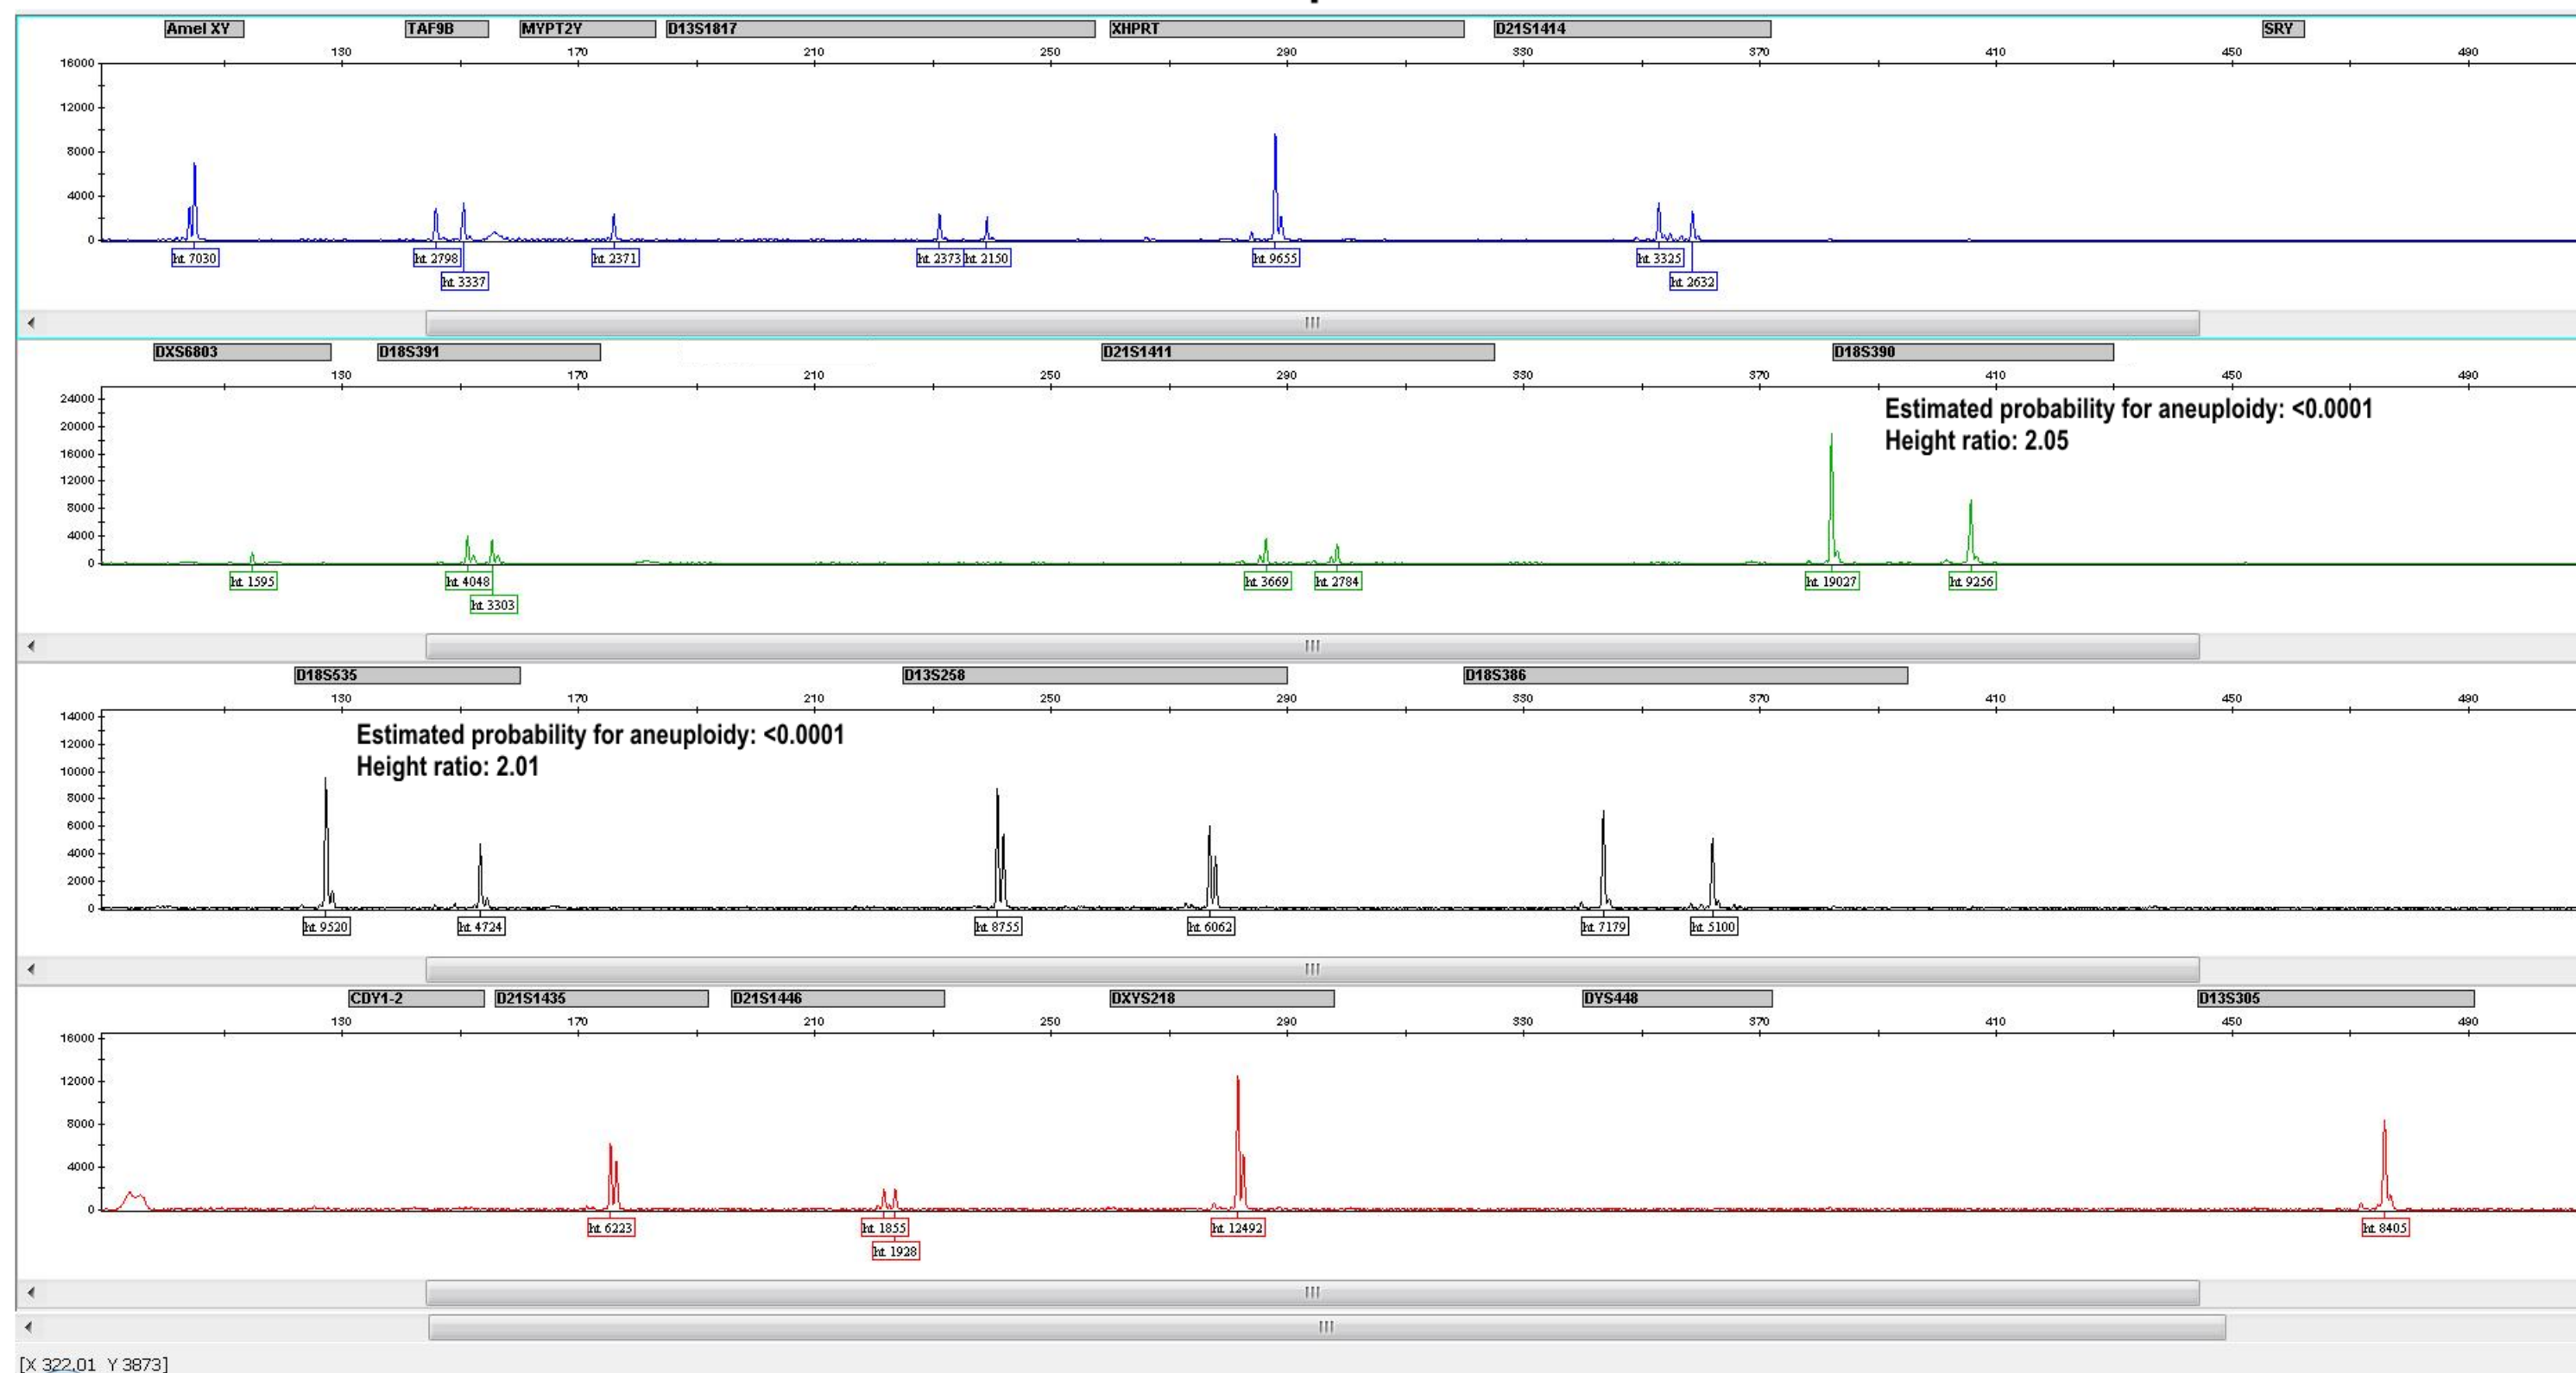**B)****D18S390 - Single PCR**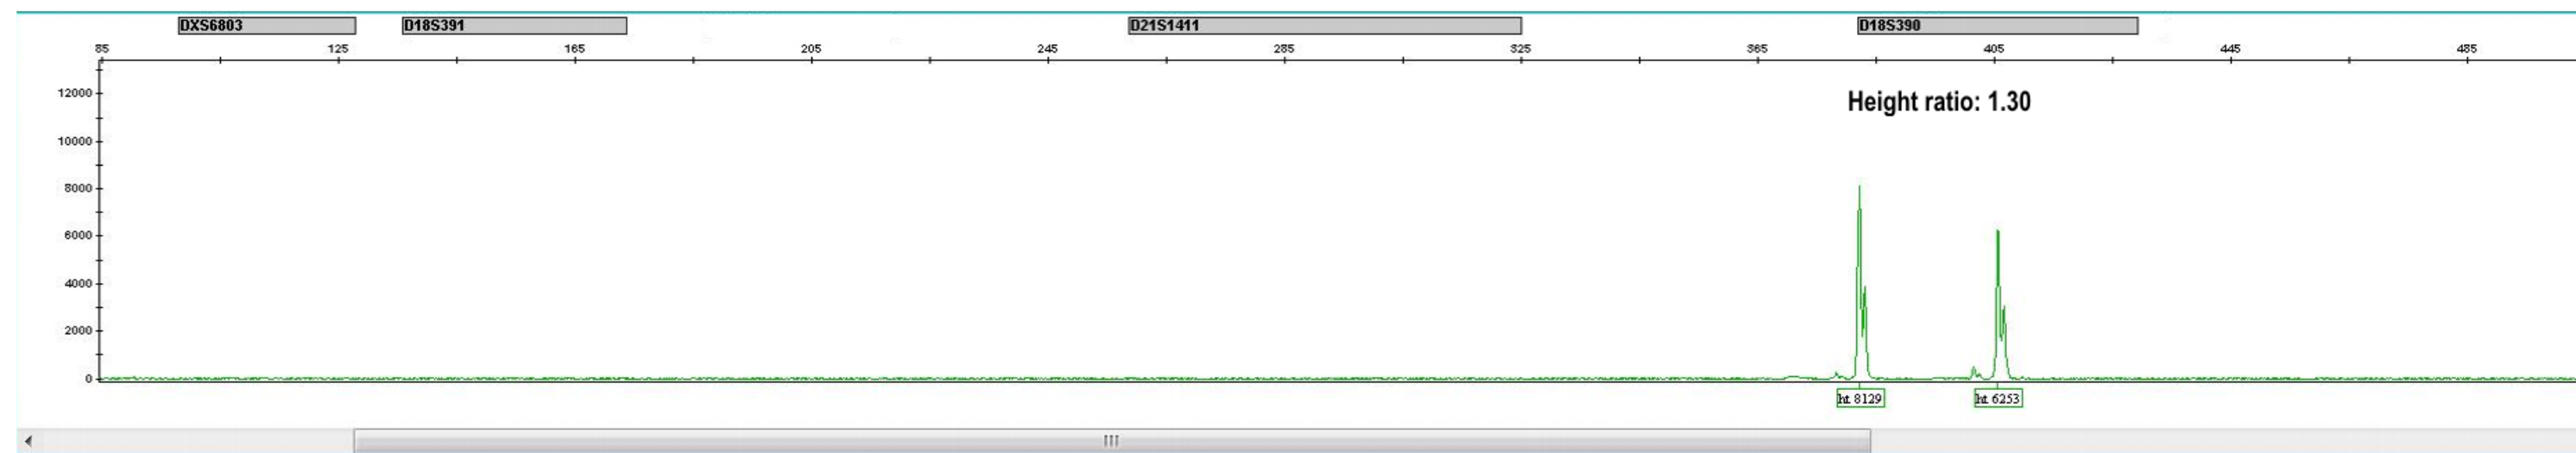**D18S535 - Single PCR**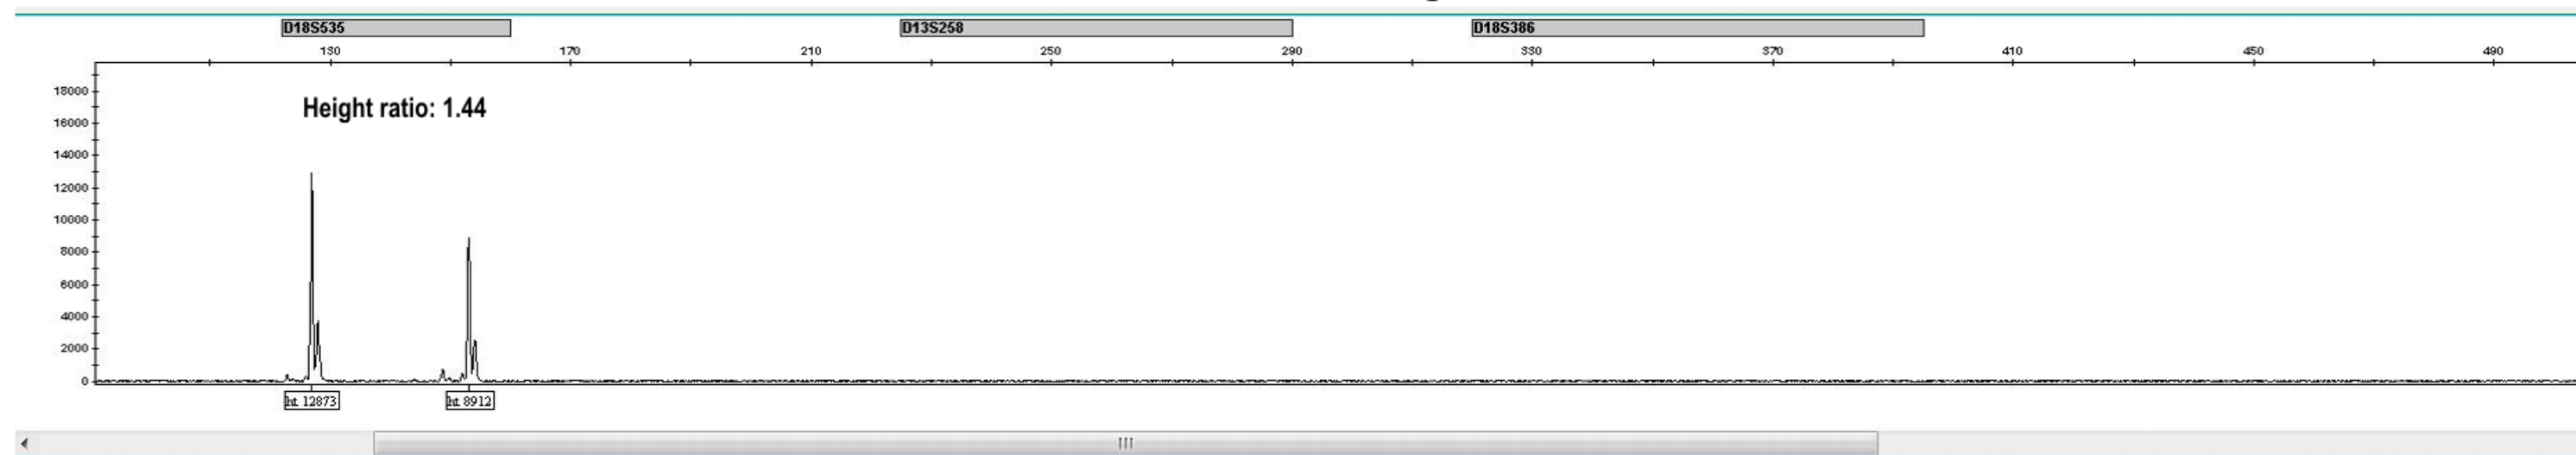

Supplement: pone.0221227.s010.pdf [file pone.0221227.s010.pdf]
